# Supplementary material for: Steroid receptors and their regulation in avian extraembryonic membranes provide a novel substrate for hormone mediated maternal effects
Source: PubMed Central journal article supplement (PMC6687743; doi:10.1038/s41598-019-48001-x), 2019-08-08
Supplement: 41598_2019_48001_MOESM1_ESM.pdf [file 41598_2019_48001_MOESM1_ESM.pdf]

1 **Title**

2 Steroid receptors and their regulation in avian extraembryonic membranes provide a novel  
3 substrate for hormone-mediated maternal effects

4

5 **Authors**

6 Neeraj Kumar<sup>1,2\*</sup>, Anja Lohrentz<sup>2</sup>, Manfred Gahr<sup>2</sup>, Ton G.G. Groothuis<sup>1</sup>

7 *<sup>1</sup>Behavioural Biology, Groningen Institute for Evolutionary Life Sciences, University of*  
8 *Groningen, the Netherlands*

9 *<sup>2</sup>Behavioural Neurobiology, Max Planck Institute for Ornithology, Seewiesen, Germany*

10

11 \*To whom correspondence should be addressed.

12 e-mail: neeraj.bioscience@gmail.com

13 **Supplementary information**

14 **Supplementary Table 1.** The descriptive statistics of RNA quality and quantification parameters.

| <i>Tissue</i>         | <b>RNA Integrity Number (RIN)</b> |           |              | <b>RNA concentration (ng/μl)</b> |           |                   | <b>A260/A280</b> |           |              |
|-----------------------|-----------------------------------|-----------|--------------|----------------------------------|-----------|-------------------|------------------|-----------|--------------|
|                       | <i>average</i>                    | <i>SD</i> | <i>range</i> | <i>average</i>                   | <i>SD</i> | <i>range</i>      | <i>average</i>   | <i>SD</i> | <i>range</i> |
| <b>Treatment: A4</b>  |                                   |           |              |                                  |           |                   |                  |           |              |
| 1                     | 9.66                              | 0.15      | 9.5 - 9.9    | 1219.94                          | 241.19    | 918.11 - 1616.32  | 2.06             | 0.01      | 2.05 - 2.09  |
| 2                     | 7.55                              | 1.29      | 5.1 - 8.6    | 158.18                           | 124.31    | 4.85 - 389.74     | 2.07             | 0.15      | 1.96 - 2.41  |
| 3                     | 7.97                              | 0.43      | 7.3 - 8.5    | 58.50                            | 28.50     | 8.81 - 100.93     | 2.15             | 0.14      | 2.06 - 2.46  |
| <b>Treatment: T</b>   |                                   |           |              |                                  |           |                   |                  |           |              |
| 1                     | 9.47                              | 0.24      | 9.2 - 9.8    | 1333.72                          | 222.72    | 1023.79 - 1552.74 | 2.07             | 0.01      | 2.06 - 2.08  |
| 2                     | 8.93                              | 0.42      | 8.1 - 9.4    | 148.13                           | 93.95     | 11.58 - 240.25    | 2.09             | 0.17      | 1.93 - 2.36  |
| 3                     | 8.49                              | 0.32      | 8.0 - 8.8    | 109.87                           | 32.44     | 69.27 - 144.51    | 2.06             | 0.03      | 2.04 - 2.11  |
| <b>Treatment: Oil</b> |                                   |           |              |                                  |           |                   |                  |           |              |
| 1                     | 9.33                              | 0.36      | 8.6 - 9.7    | 1130.44                          | 179.16    | 870.67 - 1378.13  | 2.06             | 0.01      | 2.05 - 2.07  |
| 2                     | 8.03                              | 0.72      | 6.9 - 9.1    | 143.28                           | 20.26     | 112.63 - 168.92   | 2.02             | 0.02      | 1.99 - 2.04  |
| 3                     | 8.80                              | 0.45      | 8.1 - 9.3    | 75.90                            | 39.59     | 7.77 - 130.71     | 2.08             | 0.07      | 1.99 - 2.21  |

15 Tissue: 1 = embryonic head, 2 = embryonic decapitated body, 3 = extraembryonic membranes

16 SD = standard deviation

17

18 **Supplementary Table 2.** The Ct values for the two reference genes (HMBS and YWHAZ) which were  
 19 used to normalize the AR and ER $\alpha$  receptor expression.

| Egg Treatment | HMBS        |                         |            | YWHAZ       |                         |            |
|---------------|-------------|-------------------------|------------|-------------|-------------------------|------------|
|               | <i>head</i> | <i>decapitated body</i> | <i>EMs</i> | <i>head</i> | <i>decapitated body</i> | <i>EMs</i> |
| 1             | 29.17       | 29.10                   | 32.85      | 28.00       | 29.82                   | 37.79      |
| 1             | 28.64       | 27.81                   | 26.66      | 27.97       | 27.09                   | 30.22      |
| 1             | 28.31       | 29.14                   | 27.45      | 27.40       | 28.18                   | 31.11      |
| 1             | 28.04       | 28.23                   | 28.33      | 27.20       | 27.58                   | 31.89      |
| 1             | 28.20       | 28.78                   | 27.11      | 27.28       | 27.50                   | 30.10      |
| 1             | 28.40       | 28.30                   | 27.13      | 27.73       | 26.53                   | 29.99      |
| 1             | 28.46       | NA                      | 26.99      | 27.88       | NA                      | 29.72      |
| 2             | 28.39       | 28.46                   | 26.15      | 27.07       | 27.60                   | 28.74      |
| 2             | 27.97       | 27.69                   | 26.96      | 27.52       | 26.72                   | 29.27      |
| 2             | 28.56       | 27.50                   | 28.14      | 26.98       | 26.13                   | 30.03      |
| 2             | 27.54       | 27.61                   | 27.46      | 27.03       | 27.60                   | 30.90      |
| 2             | 28.18       | 28.21                   | 27.76      | 27.17       | 27.05                   | 30.19      |
| 2             | 28.84       | NA                      | 28.47      | 28.26       | NA                      | 30.06      |
| 2             | 28.32       | NA                      | 27.90      | 27.36       | NA                      | 30.47      |
| 3             | 28.83       | 27.39                   | 26.94      | 27.37       | 26.45                   | 28.06      |
| 3             | 28.46       | 28.74                   | 27.62      | 27.57       | 27.43                   | 29.53      |
| 3             | 28.79       | 28.19                   | 26.93      | 27.58       | 27.51                   | 29.42      |
| 3             | 27.99       | 28.04                   | 27.71      | 27.00       | 27.65                   | 30.89      |
| 3             | 29.10       | 29.45                   | 27.65      | 27.60       | 28.69                   | 31.47      |
| 3             | 28.43       | 28.28                   | 27.52      | 27.09       | 27.48                   | 30.64      |
| 3             | NA          | 28.06                   | NA         |             | 27.39                   | NA         |

Treatment: 1 = A4, 2 = T, 3 = Oil

NA = data not available
